# Supplementary material
Source: PubMed Central journal article supplement (PMC4454080)
Supplement: jcbn14-109st01.pdf [file jcbn14-109st01.pdf]

**Supplemental Table. 1a.** LPS activating time after AX treatment (TNF- $\alpha$ )

|                       | 1 h   |        | 3 h   |        | 6 h     |        | 12 h  |        |
|-----------------------|-------|--------|-------|--------|---------|--------|-------|--------|
|                       | Cont. | Pre-AX | Cont. | Pre-AX | Cont.   | Pre-AX | Cont. | Pre-AX |
| Measurement 1 (pg/ml) | 0.761 | 0.000  | 1.522 | 1.142  | 0.38057 | 0.761  | 0.381 | 0.000  |
| Measurement 2 (pg/ml) | 0.381 | 0.000  | 0.761 | 0.000  | 3.42513 | 0.000  | 2.664 | 0.381  |
| Measurement 3 (pg/ml) | 1.142 | 0.381  | 1.142 | 1.522  | 2.66399 | 0.000  | 5.328 | 0.381  |
| Mean                  | 0.761 | 0.127  | 1.142 | 0.888  | 2.157   | 0.254  | 2.791 | 0.254  |

Cytokine assay of pre-astaxanthin (AX) on TNF- $\alpha$  (enzyme-linked immunosorbent assay; ELISA).

**Supplemental Table. 1b.** LPS activating time after AX treatment (IL-6)

|                       | 12 h    |        | 24 h    |         | 120 h   |         |
|-----------------------|---------|--------|---------|---------|---------|---------|
|                       | Cont.   | Pre-AX | Cont.   | Pre-AX  | Cont.   | Pre-AX  |
| Measurement 1 (pg/ml) | 114.083 | 94.743 | 121.036 | 96.047  | 269.235 | 198.178 |
| Measurement 2 (pg/ml) | 83.661  | 62.148 | 127.555 | 100.175 | 266.844 | 197.743 |
| Measurement 3 (pg/ml) | 79.097  | 98.220 | 114.952 | 105.825 | 243.811 | 211.650 |
| Mean                  | 92.280  | 85.037 | 121.181 | 100.682 | 259.963 | 202.524 |

Cytokine assay of pre-astaxanthin (AX) on IL-6 (ELISA).
