# Supplementary material
Source: PubMed Central journal article supplement (PMC4454080)
Supplement: jcbn14-109st02.pdf [file jcbn14-109st02.pdf]

**Supplemental Table. 2a.** AX treatment time after LPS activation (TNF- $\alpha$ )

|                       | 1 h   |        | 3 h   |        | 6 h   |        | 12 h  |        |
|-----------------------|-------|--------|-------|--------|-------|--------|-------|--------|
|                       | Cont. | Pre-AX | Cont. | Pre-AX | Cont. | Pre-AX | Cont. | Pre-AX |
| Measurement 1 (pg/ml) | 1.522 | 0.000  | 1.522 | 0.000  | 0.000 | 0.000  | 3.425 | 0.000  |
| Measurement 2 (pg/ml) | 0.381 | 0.000  | 2.283 | 1.522  | 2.283 | 3.045  | 2.664 | 0.000  |
| Measurement 3 (pg/ml) | 1.142 | 0.000  | 1.522 | 0.000  | 4.186 | 0.000  | 1.522 | 0.381  |
| Mean                  | 1.015 | 0.000  | 1.776 | 0.507  | 2.157 | 1.015  | 2.537 | 0.127  |

Cytokine assay of post-astaxanthin (AX) on TNF- $\alpha$  (ELISA).

**Supplemental Table. 2b.** AX treatment time after LPS activation (IL-6)

|                       | 12 h   |        | 24 h   |        | 120 h  |        |
|-----------------------|--------|--------|--------|--------|--------|--------|
|                       | Cont.  | Pre-AX | Cont.  | Pre-AX | Cont.  | Pre-AX |
| Measurement 1 (pg/ml) | 3.260  | 1.521  | 1.956  | 10.430 | 8.909  | 9.779  |
| Measurement 2 (pg/ml) | 15.863 | 1.521  | 17.167 | 10.213 | 10.865 | 19.992 |
| Measurement 3 (pg/ml) | 11.517 | 1.738  | 18.036 | 4.781  | 31.291 | 10.430 |
| Mean                  | 10.213 | 1.594  | 12.386 | 8.475  | 17.022 | 13.400 |

Cytokine assay of post-astaxanthin (AX) on IL-6 (ELISA).
